1 **Title: No Evidence for Temperature-Dependence of the COVID-19 Epidemic**

2 **Running Title:** Temperature-independence of COVID-19 Epidemic

3 **Keywords:** COVID-19, epidemic, temperature, exponential rate, R0

4 **Authors:** Tahira Jamil<sup>1,2</sup>, Intikhab Alam<sup>1</sup>, Takashi Gojobori<sup>1</sup>, and Carlos M. Duarte<sup>1,2</sup>

5

6 **Affiliations:**

7 1. Computational Bioscience Research Center (CBRC), King Abdullah University of Science  
8 and Technology, Thuwal 23955, Saudi Arabia

9 2. Red Sea Research Centre (RSRC), King Abdullah University of Science and Technology,  
10 Thuwal 23955, Saudi Arabia

11

## 12 **1. Abstract**

13 The pandemic of the COVID-19 disease extended from China across the north-temperate  
14 zone, and more recently to the tropics and southern hemisphere. We find no evidence that  
15 spread rates decline with temperatures above 20 °C, suggesting that the COVID-19 disease is  
16 unlikely to behave as a seasonal respiratory virus.

17

18

19

20

## 21 **2. Introduction**

22 On 30 January the WHO declared the novel coronavirus (COVID-19) outbreak a  
23 public health emergency of international concern (<http://www.euro.who.int/en/home>). The  
24 epidemic spread gradually from Wuhan province in China, to other Asian nations, the middle  
25 east and Europe. By early March the epidemic was mostly concentrated in territories

26 extending between 30°N and 50 °N (Sajadi et al., 2020), now in late winter, leading to the  
27 suggestion, echoed by the global media, that the epidemic is likely to be temperature-  
28 dependent. This supported speculation of possible decline in severity with the advent of  
29 warmer spring and summer temperatures in north-temperate latitudes (Sajadi et al.,  
30 2020; Wang et al., 2020), comparable to many viruses affecting human respiratory systems,  
31 including SARS (Tan et al., 2005; Gaunt et al., 2010).

32 However, recent (updated up to March 26, 2020; cf. Methods) data revealed the  
33 spread of the epidemic across territories experiencing warm temperatures in the tropics (e.g.  
34 Indonesia, Singapore, Brazil) and southern hemisphere as well (e.g. Australia, Argentina).  
35 The current distribution of the epidemic challenges, therefore, the inference that SARS-CoV-  
36 2 may behave as a seasonal respiratory virus based on previous statistical analyses from  
37 earlier realized distributions.

38 Here we examine the relationship between the apparent exponential rate of SARS-  
39 CoV-2 spread ( $\gamma$ ) and the Basic Reproductive number of infection ( $R_0$ ) and the average daily  
40 temperature ( $T_{avg}$ ) across nations and Chinese provinces where epidemics, with at least 100  
41 case reported, have been reported (data updated up to 26 March, 2020).

### 42 **3. Methods**

#### 43 *Novel Coronavirus (COVID-19) Cases Data*

44 The Novel Coronavirus (COVID-19) daily data are confirmed cases for affected  
45 countries and provinces of China reported between 31st December 2019 to 26th March 2020.  
46 The data was collected from the reports released by WHO, European Centre for Disease  
47 Prevention and Control (ECDC), and John Hopkin CSSA. Data include confirmed and a  
48 cumulative total of COVID-19 cases in affected countries/provinces.

49

#### 50 *Average ambient temperature*

51 The average temperatures of all the affected countries were collected  
52 from <https://www.timeanddate.com/>. The monthly mean temperature of February and the  
53 three-weeks mean temperature of March of capital cities for the various nations were used as  
54 reference temperatures for the country.

55

### 56 *Statistical Analysis*

57 The number of COVID-19 incidences follows the expected exponential growth,  
58 although rates are only robust when cases exceed 100 persons for any country or province.  
59 Hence, we fitted the exponential model to each country and each province of China. We  
60 calculated exponential rate parameters for the countries where the COVID-19 incident has at  
61 least a 10-day growth period, and the total number of cases was at least 100.

$$62 \quad N = ae^{\gamma Days}, \quad \gamma > 0$$

$$63 \quad \log N = \alpha + \gamma Days.$$

64 Where N is the cumulative number of diagnosed persons and Days is the number of days and  
65  $\gamma$  is the exponential rate ( $100 \times \gamma = \%$  increase per day).

66

67 To calculate the effect of temperature on the exponential rate parameter, we first  
68 regressed the exponential rate parameters retrieved from the exponential model on *Temp* and

$$69 \quad Temp^2$$

$$\gamma \sim Temp + Temp^2$$

70 If the squared term is significant, it provides evidence of nonlinearity.

71 The thermal performance of COVID-19 was characterized by fitting spread rate estimate or  
72 growth parameter ( $\gamma$ ) and temperature to the Gaussian function;

$$\gamma = ae^{\left[-0.5\left(\frac{Temp-opt}{tot}\right)^2\right]},$$

73 *Temp* is the average temperature (in °C) that best encompasses the growth period of COVID-  
74 19 cases since its first incidence in a country/region of China. Where, *a* (amplitude) is the  
75 coefficient related to maximum of spread rate of countries, the optimum (*opt*) on the  
76 temperature gradient is where the maximum of spread rate is attained and the tolerance (*tol*)  
77 gives the width of the response curve. This model has non-linear form, and the model  
78 parameters *opt* and *tol* occur nonlinearly in the model function. Parameter of thermal  
79 performance curve was estimated by fitting Gaussian model to the growth rate and  
80 temperature of infected countries. The initial values for the Gaussian parameters  
81 *opt*, *tol* and *a* were obtained directly using maximum-likelihood polynomial regression for  
82 the Gaussian function.

83 Estimated the basic reproductive number ( $R_0$ ) for COVID-19 from China and other  
84 countries using the Statistical exponential growth model method adopting serial interval from  
85 an average of SARS (mean=8.4 days, SD=3.8 days) and MERS (mean=7.6 days, SD=3.4  
86 days). All analyses were performed using R statistical computing software.

87

#### 88 **4. Results**

89 Our results show that evidence for a temperature-dependence of the transmission  
90 reported in previous papers was likely to be an artifact, reflecting the pathways of spread, and  
91 that there is no evidence for thermal dependence of the transmission across the -10 to 31°C  
92  $T_{avg}$  range across the affected regions. This suggests little basis to expect evidence for the  
93 virus to behave as a seasonal respiratory virus.

94 Epidemiological data consisting in the rate of increase in accumulated diagnosed  
95 cases among nations (global) shows  $\gamma$  ranging from 5.6 % day<sup>-1</sup> to 34.8 % day<sup>-1</sup> (except  
96 Turkey; Figure S1), with an average of  $22.39 \pm 0.94$  % day<sup>-1</sup> (Figure 1, Figure S1), and  
97 apparent  $R_0$  of  $1.90 \pm 0.07$  (Figure 1, Table A1). Surprisingly,  $\gamma$  and  $R_0$  across Chinese

98 provinces (mean  $\pm$  SE =  $4.1 \pm 0.1$  % day<sup>-1</sup> and  $1.09 \pm 0.01$ ) were well below those of other  
99 nations (mean  $\pm$  SE =  $22.39 \pm 0.94$  % day<sup>-1</sup> and  $1.90 \pm 0.07$ ), possibly because much faster  
100 confinement of the Chinese population did not allow for the potential exponential rates under  
101 uncontrolled conditions to be realized. The broad variability in realized  $\gamma$  and R0 between  
102 nations (global) and provinces (China) largely reflects differences in detection likelihood  
103 along with the timing and rigour of adoption of confinement measures.

104 The relationship between  $\gamma$  and R0 and T<sub>avg</sub> shows no evidence for a reduced spread  
105 rate with warming (Figure 1), unlike analyses based on previous data. A number of nations  
106 with T<sub>avg</sub> > 20 °C, including subtropical and tropical (Brazil, Qatar, Saudi Arabia and  
107 Indonesia), and southern-hemisphere (Peru, Chile, Argentina) nations (Figure 2), support  $\gamma$   
108 and R0 above the median values of 23.8% day<sup>-1</sup> and 1.75, respectively (Figure 1). However,  
109 the same analysis conducted one weeks ago (15th March), did provide some evidence for low  
110  $\gamma$  and R0 for T<sub>avg</sub> > 20 °C (Figure S2). Our updated results (Figure 1) show, however, that  
111 this apparent temperature-dependence was confounded with a prevailing zonal pattern of  
112 spread across the north-temperate zone, possibly reflecting the main patterns of human  
113 mobility, which delayed arrival of the epidemics to the southern hemisphere and the tropics.

## 114 **5. Discussion**

115 These results suggest that, contrary to prior assessments, the spread rate of the  
116 COVID-19 pandemic is temperature-independent, suggesting that there is little hope for relief  
117 as temperatures in the northern hemisphere increase, and that poor nations with weak health  
118 systems in tropical regions, such as African, are at great risk.

119 Data sources: The data on COVID-19 is available publicly across many sources; where  
120 downloadable data files are updated daily few are listed below;

121 World health organization (<https://www.who.int/emergencies/diseases/novel-coronavirus-2019/situation-reports/>)

122

123 Johns Hopkins CSSE (<https://data.humdata.org/dataset/novel-coronavirus-2019-ncov-cases>)

125 [Accessed March 25, 2020]  
126 European Centre for Disease Prevention and Control  
127 ([https://www.ecdc.europa.eu/en/publications-data/download-todays-data-geographic-](https://www.ecdc.europa.eu/en/publications-data/download-todays-data-geographic-distribution-covid-19-cases-worldwide)  
128 [distribution-covid-19-cases-worldwide](https://www.ecdc.europa.eu/en/publications-data/download-todays-data-geographic-distribution-covid-19-cases-worldwide)) [Accessed March 26, 2020].  
129

### 130 **Author Contribution**

131  
132 CMD and TJ conceived and designed the research, TJ conducted the analysis, TJ and CMD  
133 wrote the first draft and all co-authors contributed to improving the paper and approved the  
134 submission.

### 135 **Funding**

136 This research was supported by funding provided by the King Abdullah University of  
137 Science and Technology to the CBRC.

138

139

### 140 **References**

141 Gaunt, E.R., Hardie, A., Claas, E.C., Simmonds, P., and Templeton, K.E. (2010).  
142 Epidemiology and clinical presentations of the four human coronaviruses 229E, HKU1,  
143 NL63, and OC43 detected over 3 years using a novel multiplex real-time PCR method.  
144 *Journal of clinical microbiology* 48, 2940-2947.  
145 Sajadi, M.M., Habibzadeh, P., Vintzileos, A., Shokouhi, S., Miralles-Wilhelm, F., and  
146 Amoroso, A. (2020). Temperature and latitude analysis to predict potential spread and  
147 seasonality for COVID-19. Available at SSRN 3550308.  
148 Tan, J., Mu, L., Huang, J., Yu, S., Chen, B., and Yin, J. (2005). An initial investigation of the  
149 association between the SARS outbreak and weather: with the view of the  
150 environmental temperature and its variation. *Journal of Epidemiology & Community*  
151 *Health* 59, 186-192.  
152 Wang, M., Jiang, A., Gong, L., Luo, L., Guo, W., Li, C., Zheng, J., Li, C., Yang, B., and  
153 Zeng, J. (2020). Temperature significant change COVID-19 Transmission in 429  
154 cities. medRxiv.  
155

156

157

158

159

160

161

162

163

164 **Figure legends**

165 **Figure 1.** The relationship between the apparent exponential rate of SARS-CoV-2 spread ( $B$ )  
166 and the Basic Reproductive number of infection ( $R_0$ ) and the average daily temperature ( $T_{avg}$ )  
167 across nations and Chinese provinces where  $> 100$  cases of COVID-19 have been reported  
168 (data last accessed 26 March, Figure S1). Green symbols represent provinces in China while  
169 red symbols represent other nations. Neither the double exponential function with  
170 temperature nor the Gaussian function provided a significant ( $p < 0.05$ ) fit for either  $\gamma$  or  $R_0$   
171 with temperature.

172

173 **Figure 2.** Distribution of the apparent exponential rate of SARS-CoV-2 spread ( $\gamma$ ) and the  
174 Basic Reproductive number of infection ( $R_0$ ) and the average daily temperature ( $T_{avg}$ ) across  
175 nations where  $> 100$  cases of COVID-19 have been reported (data last accessed 26 March).

176

177 **Appendix Figure S1.** The apparent average ( $\pm$  SE) exponential rate of SARS-CoV-2 spread  
178 ( $\gamma$ ), the average (and 95% confidence limits) of Basic Reproductive number of infection ( $R_0$ )  
179 and the average daily temperature ( $T_{avg}$ ) total case and number of days since the first case  
180 reported across nations and Chinese provinces where epidemics, with at least 100 case  
181 reported, have been reported (data updated through 26 March, 2020).

182

183 **Appendix Figure S2.** The relationship between the apparent exponential rate of SARS-CoV-  
184 2 spread ( $\gamma$ ) and the Basic Reproductive number of infection ( $R_0$ ) and the average daily

185 temperature ( $T_{\text{avg}}$ ) across nations and Chinese provinces where  $> 100$  cases of COVID-19  
186 have been reported, as of Figure 1, but with data updated only until 15<sup>th</sup> March. The Gaussian  
187 function with temperature provided a significant fit for  $\gamma$  with temperature.



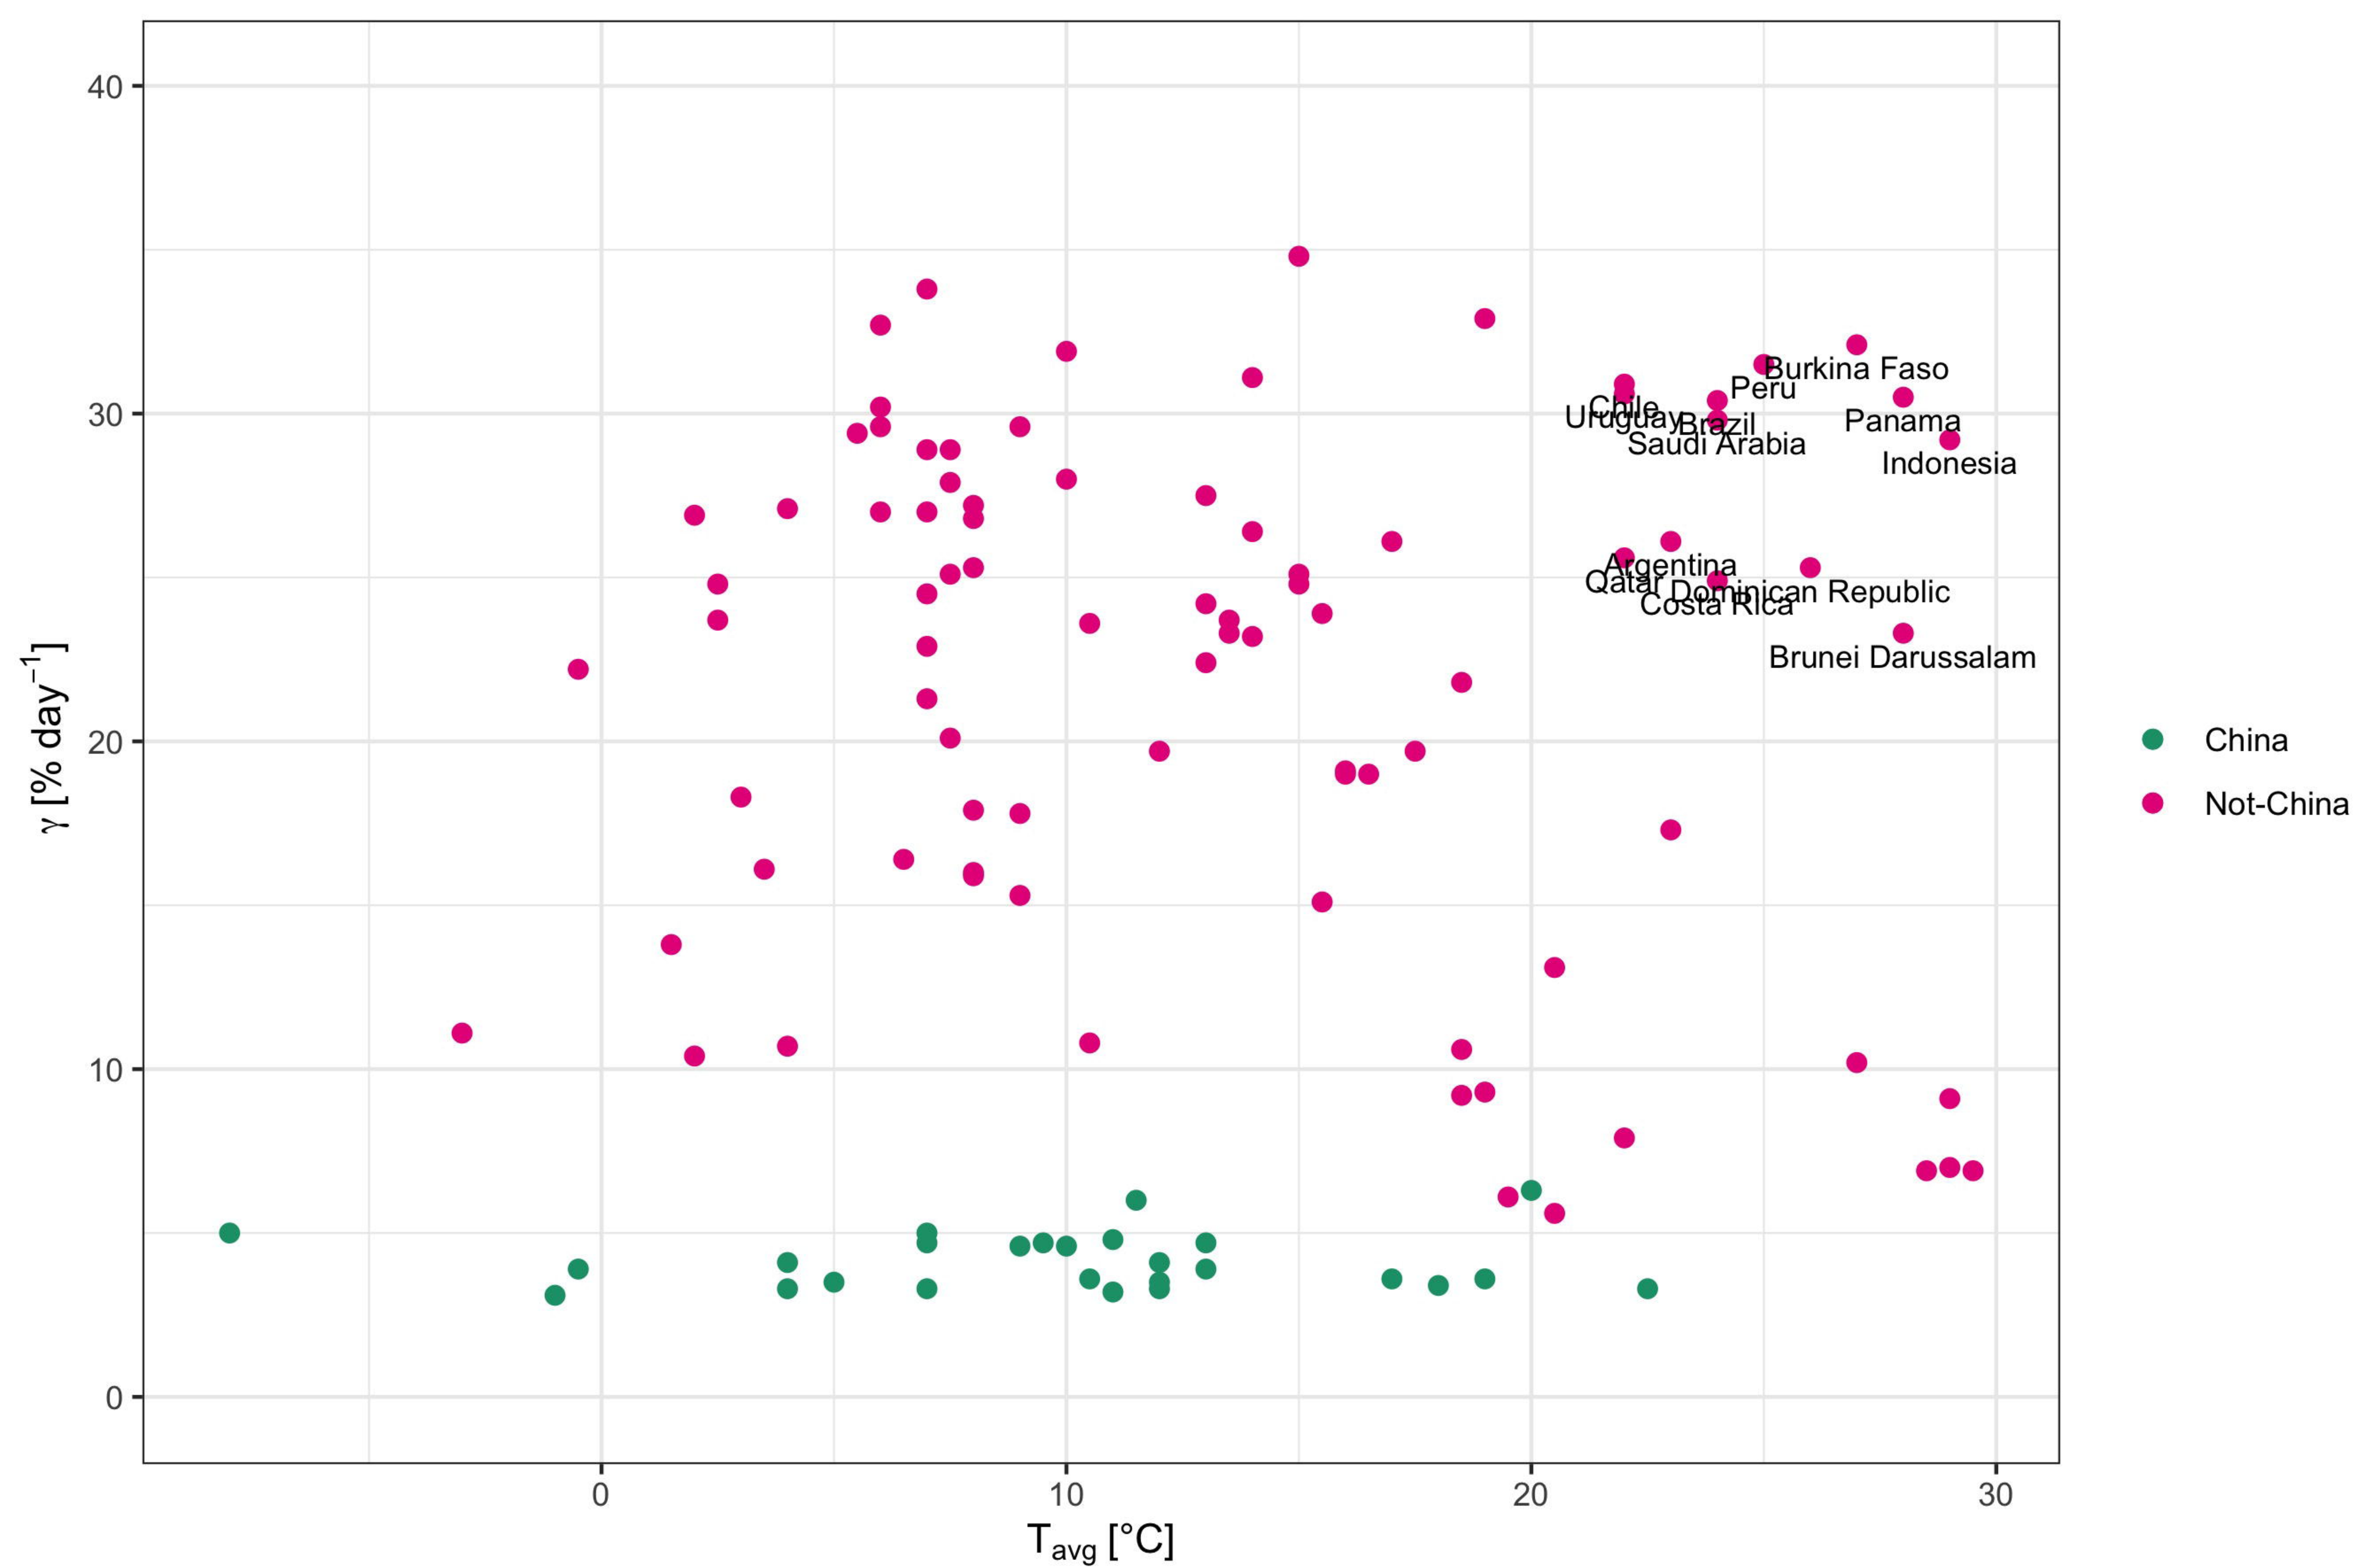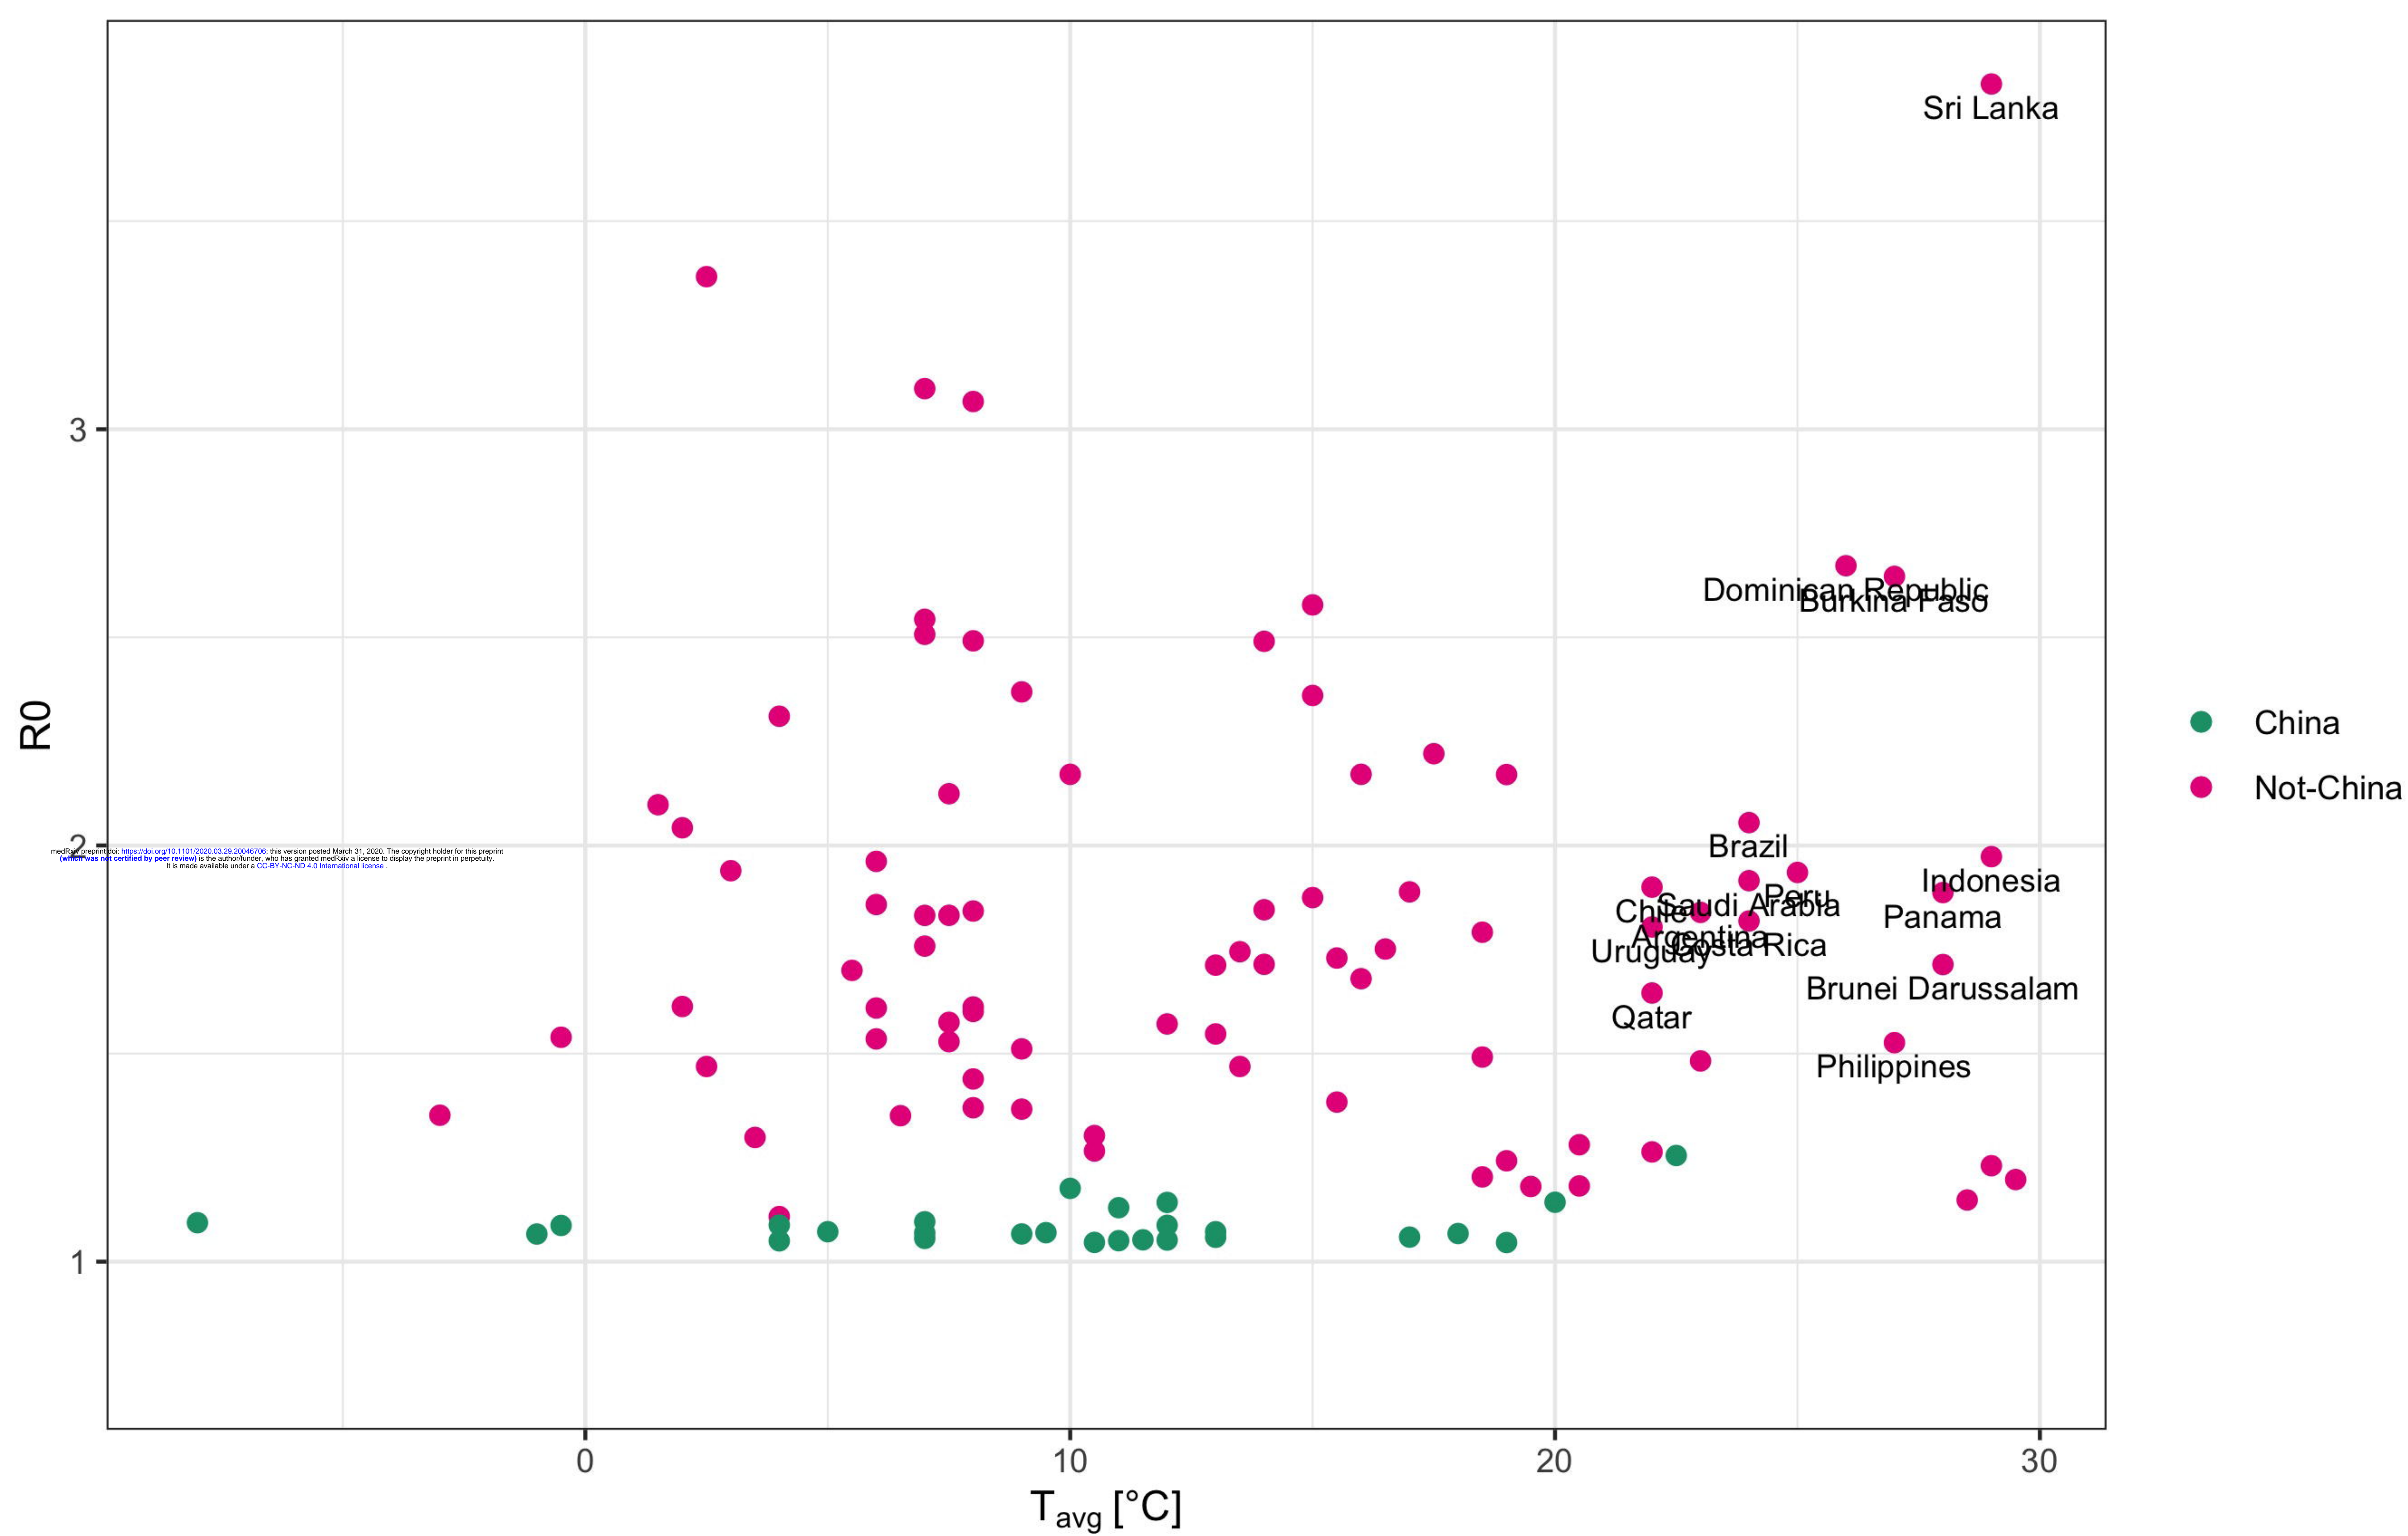



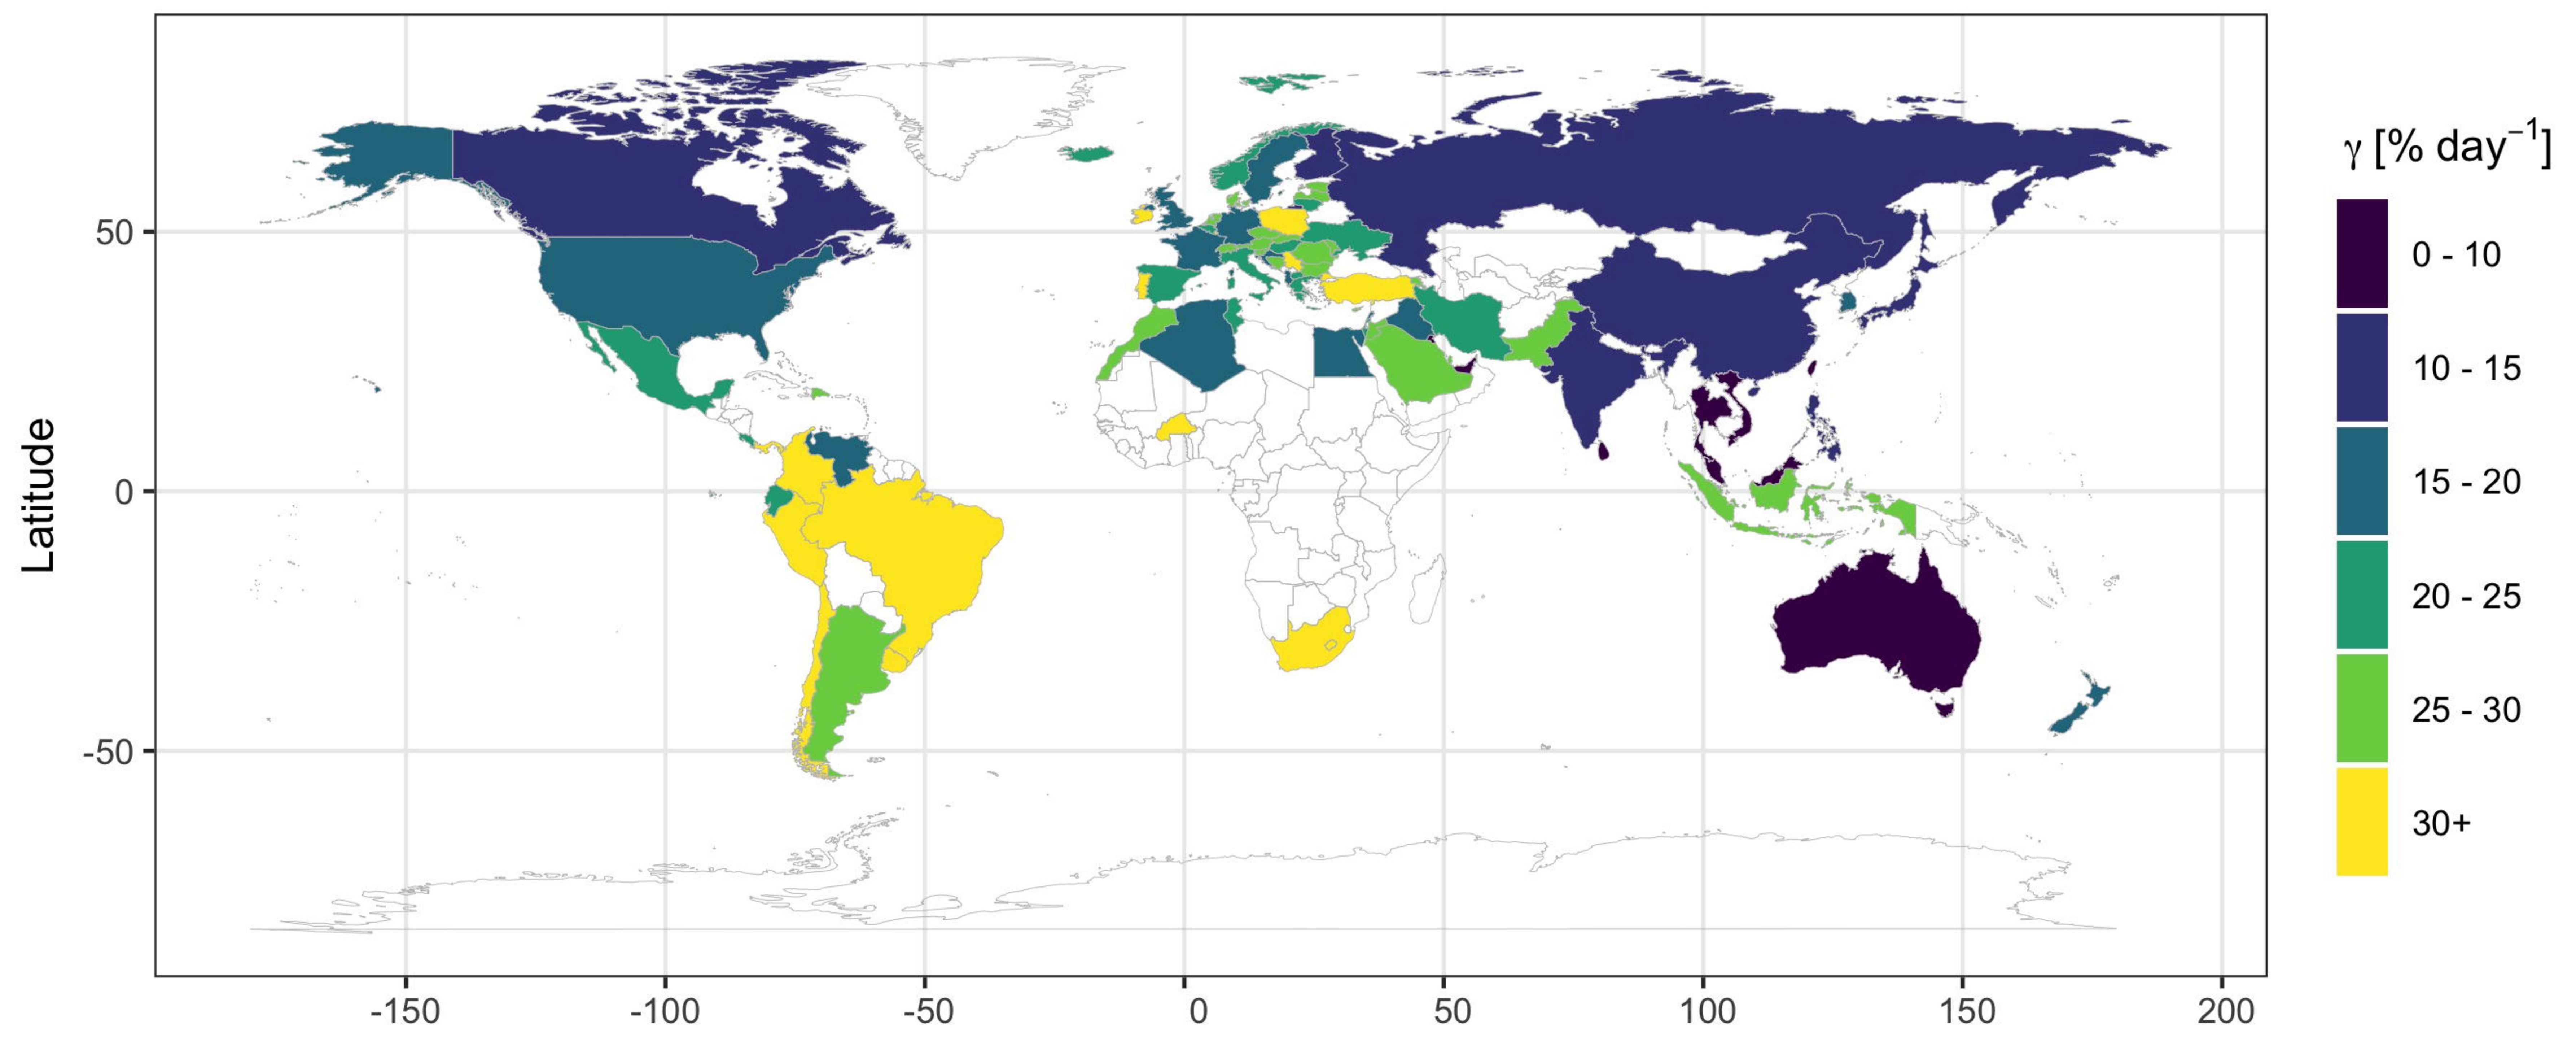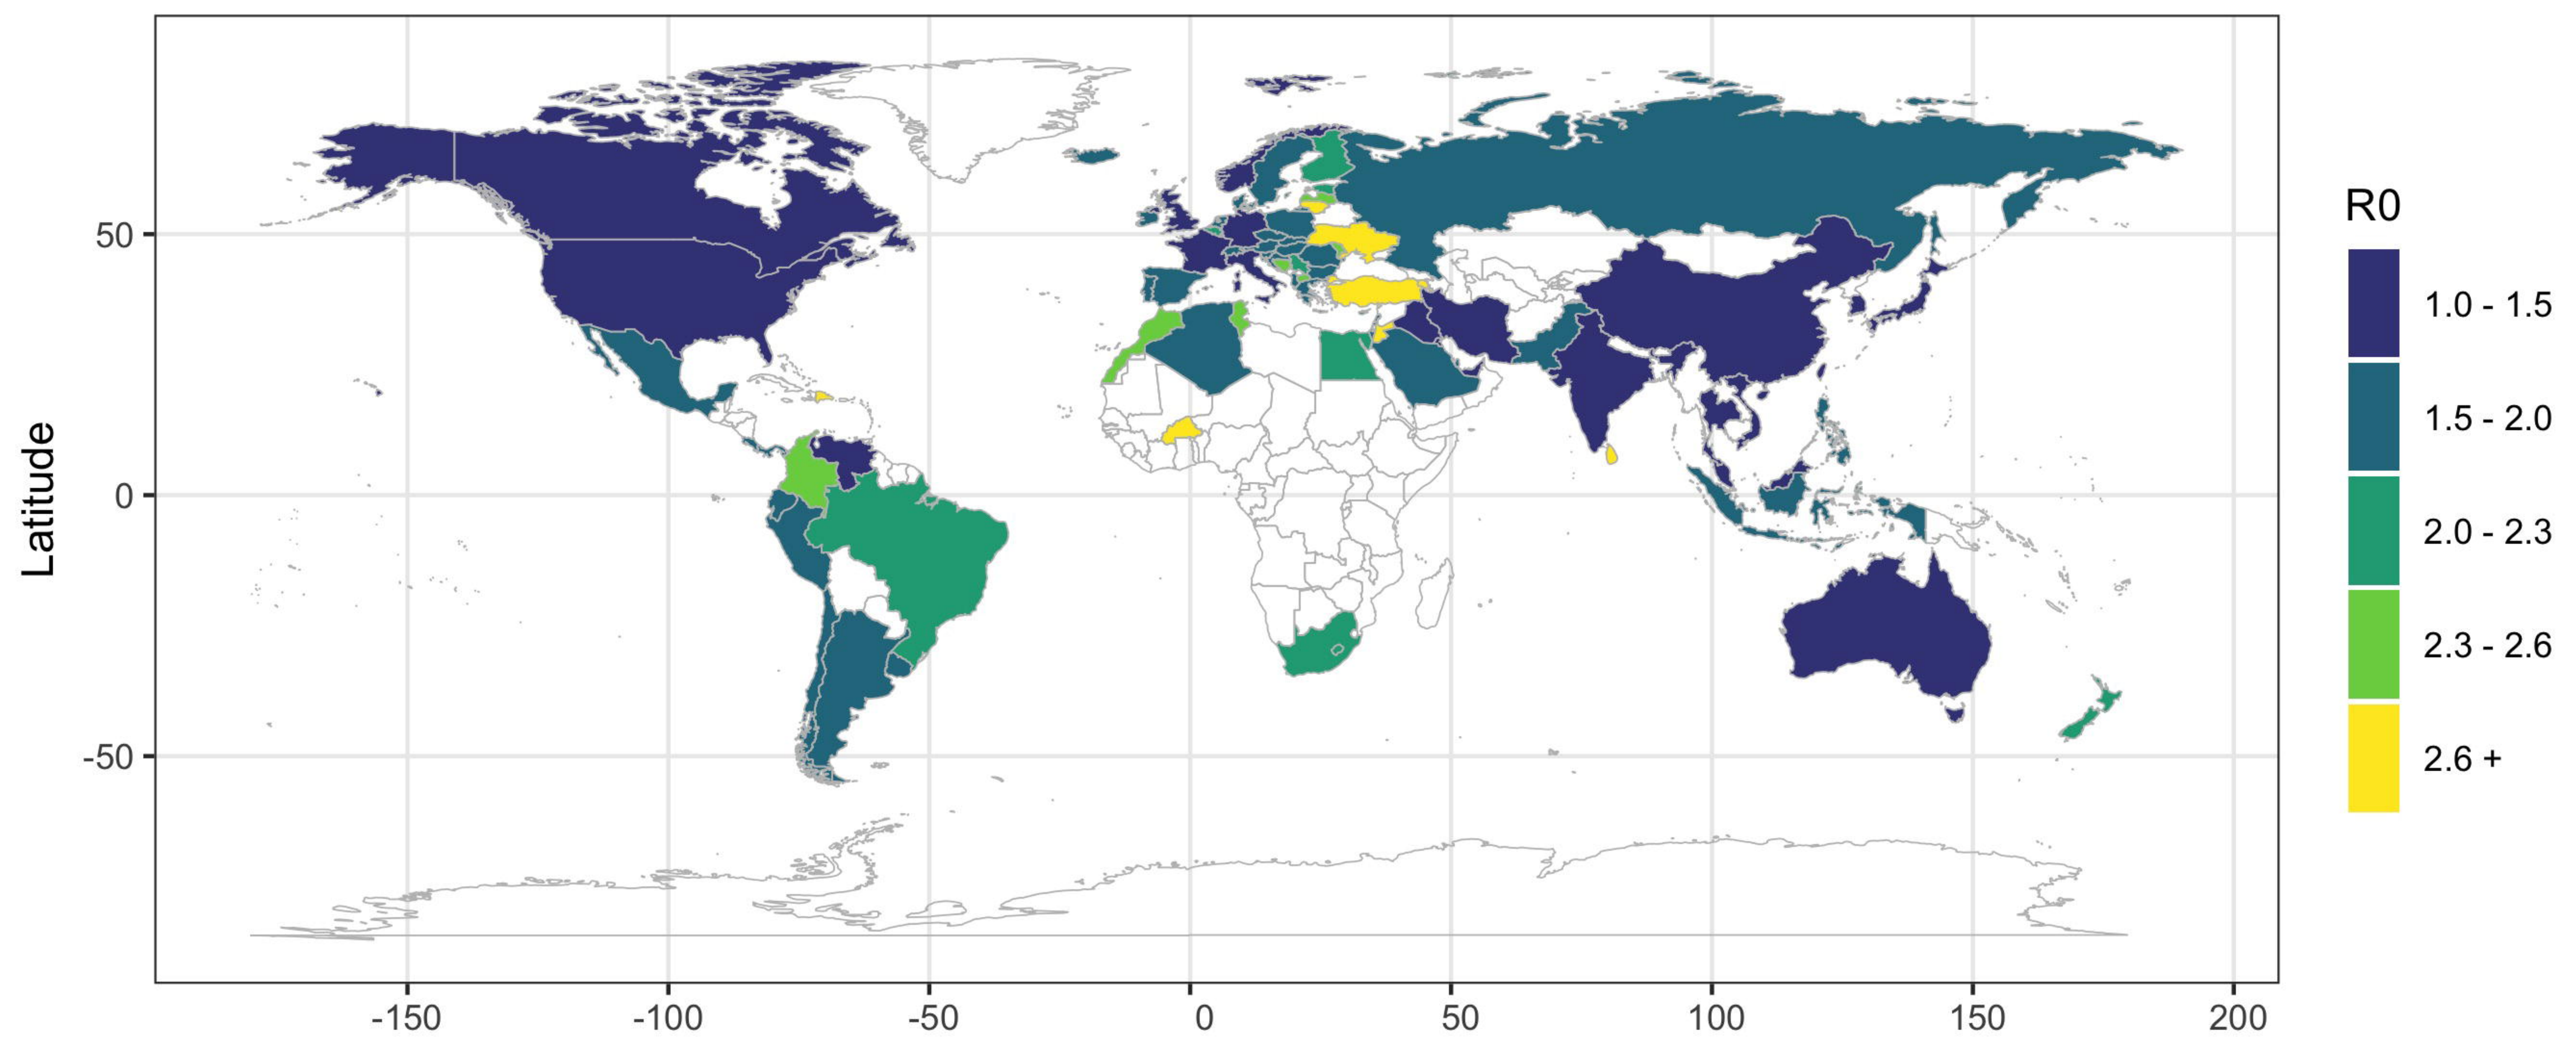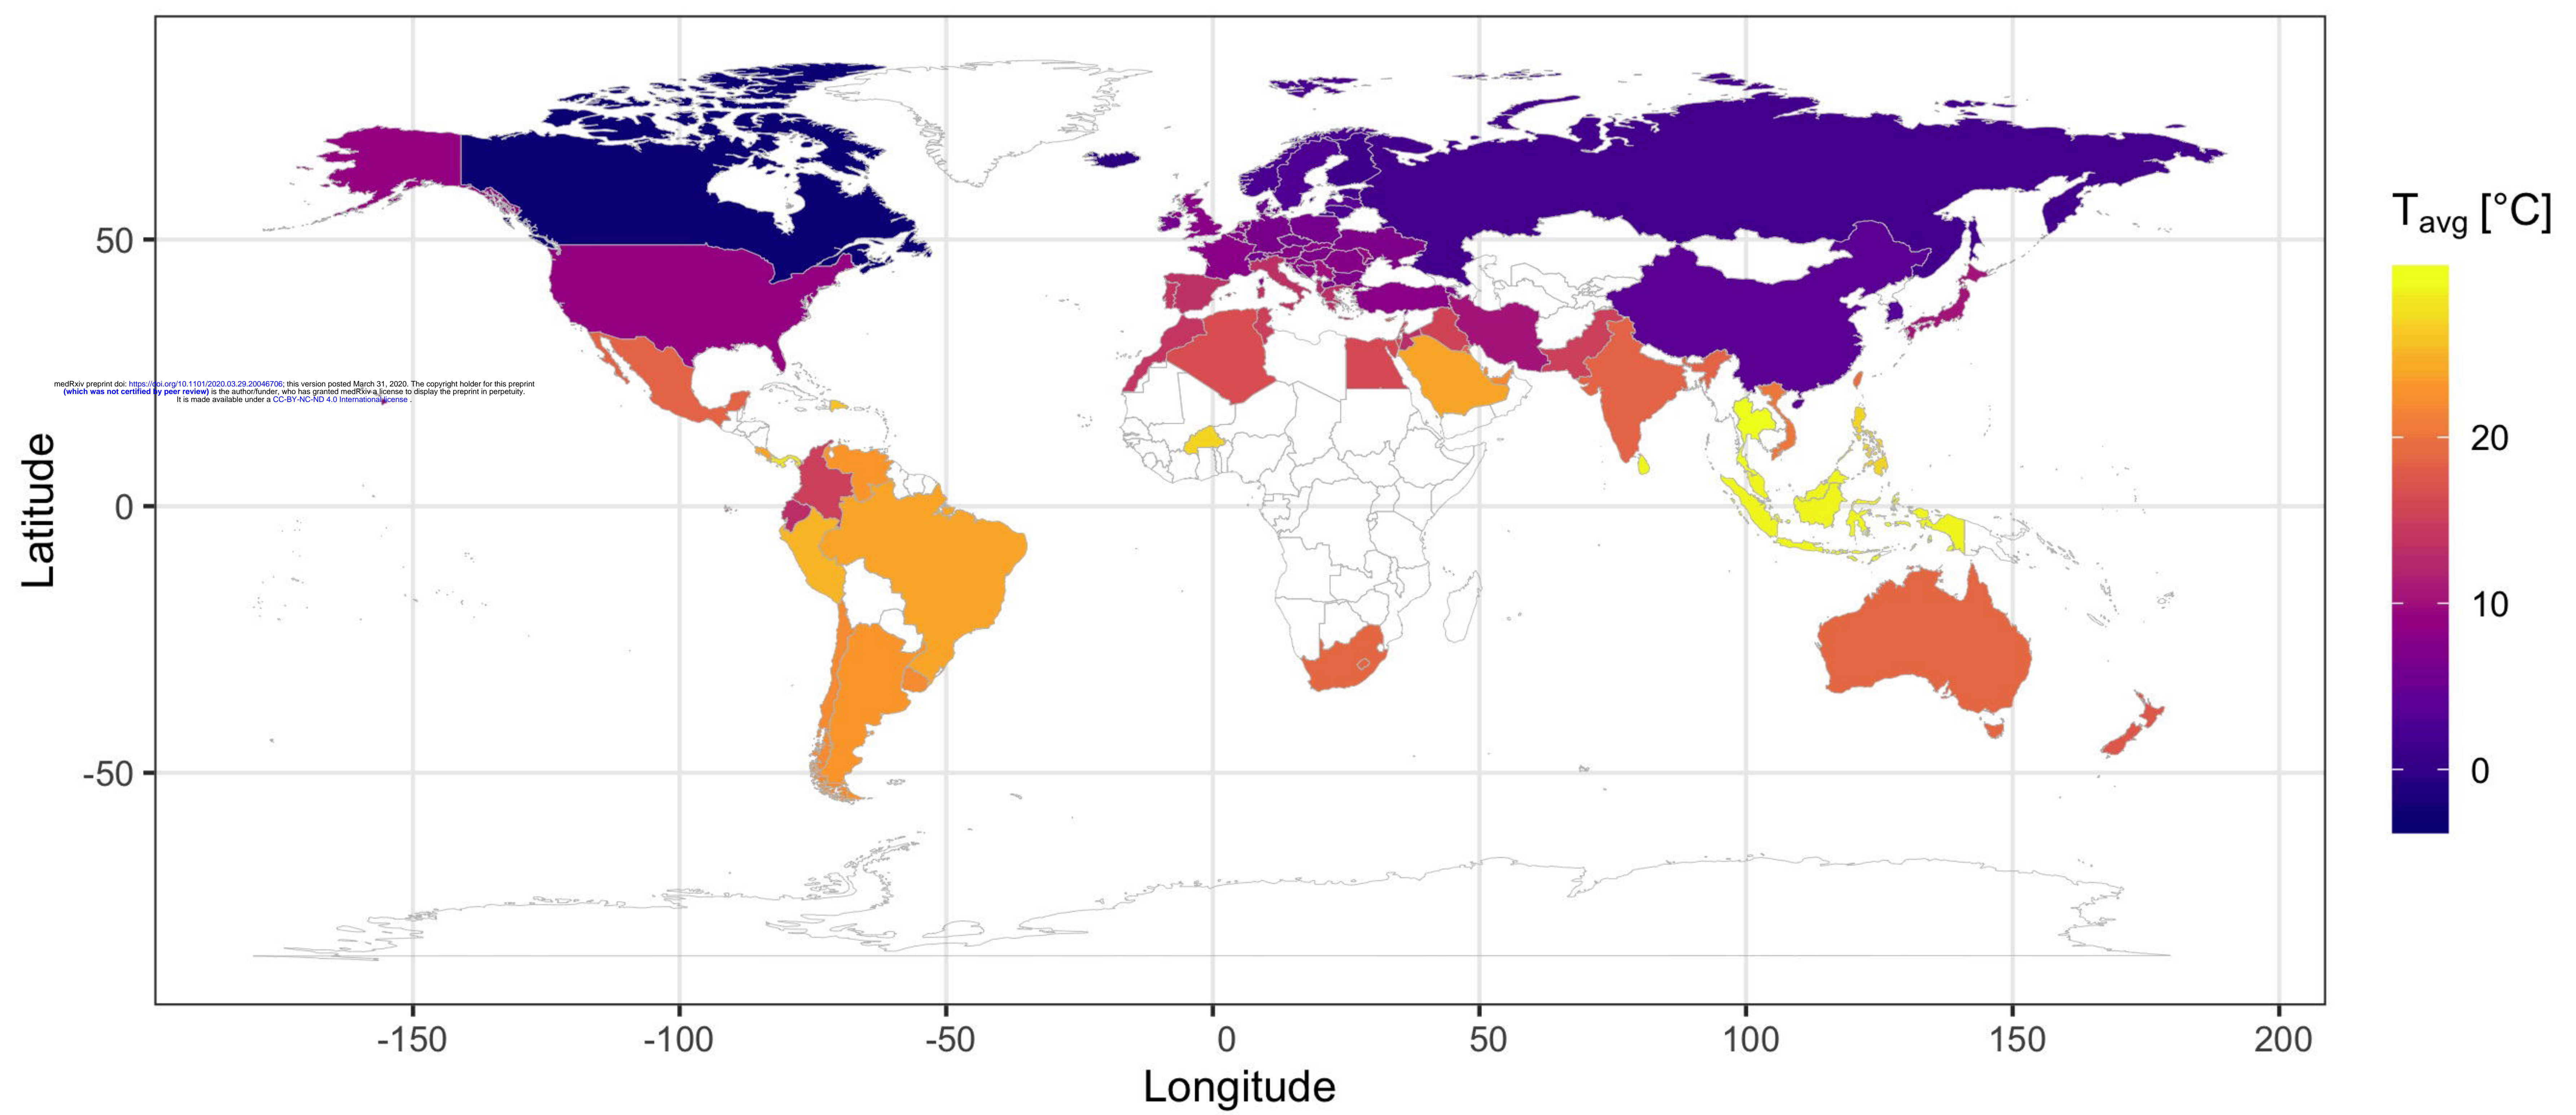

Source: https://www.medrxiv.org/content/10.1101/2020.03.29.20046706v1.full.pdf
